# Supplementary material for: Effect of Oxalic Acid Treatment on Conductive Coatings Formed by Ni@Ag Core–Shell Nanoparticles
Source: MDPI journal article supplement (doi:10.3390/ma15010305), 2022-01-01
Supplement: s1 [file s1]

# Effect of Oxalic Acid Treatment on Conductive Coatings Formed by Ni@Ag Core–Shell Nanoparticles

Anna Pajor-Świerzy <sup>1,\*</sup>, Radosław Pawłowski <sup>2</sup>, Piotr Sobik <sup>2</sup>, Alexander Kamyshny <sup>3</sup>  
and Krzysztof Szczepanowicz <sup>1</sup>

<sup>1</sup> Jerzy Haber Institute of Catalysis and Surface Chemistry Polish Academy of Sciences, Niezapominajek 8, 30-239 Krakow, Poland; krzysztof.szczepanowicz@ikifp.edu.pl

<sup>2</sup> Abraxas Jeremiasz Olgierd, Piaskowa 27, 44300 Wodzisław Śląski, Poland; radek.pawlowski@helioenergia.com (R.P.); piotr.sobik@helioenergia.com (P.S.)

<sup>3</sup> Casali Center for Applied Chemistry, Institute of Chemistry, Edmond J. Safra Campus, The Hebrew University of Jerusalem, Jerusalem 91904, Israel; alexander.kamyshny@mail.huji.ac.il

\* Correspondence: anna.pajor-swierzy@ikifp.edu.pl

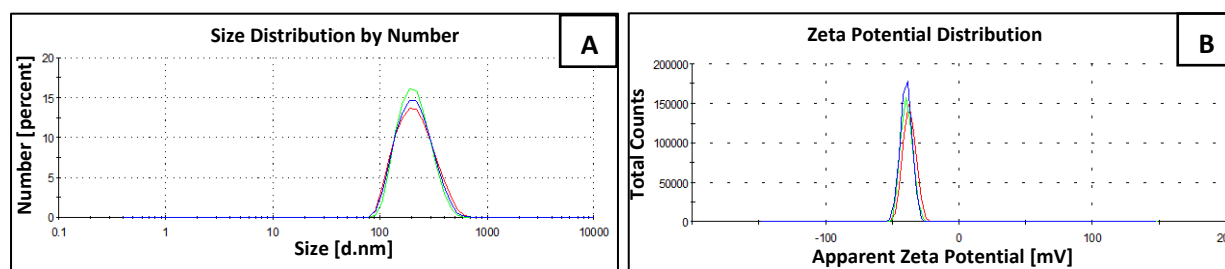

**Figure S1.** Size distribution (A) and zeta potential (B) of Ni-Ag NPs as an average of three subsequent runs.

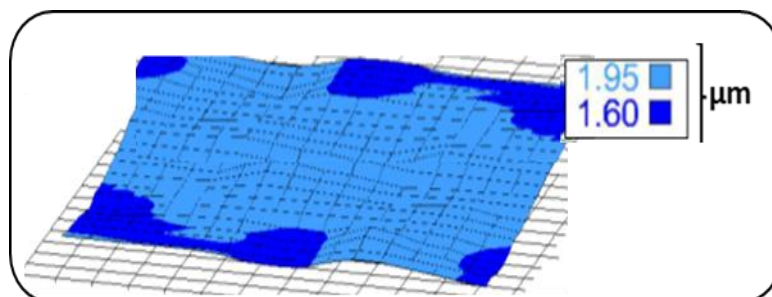

**Figure S2.** The thickness of the metallic coating treated with 1 wt% OA after sintering as measured by the EDXRF method.
